# Supplementary material
Source: MDPI journal article supplement (https://www.mdpi.com/search?q=molecules-24-00447)
Supplement: s001 [file molecules-24-00447-s001.pdf]

Supporting Information

Synthesis, Characterization, Absorption Properties, and Electronic Structures of  
Paddlewheel-Type Dirhodium(II) Tetra- $\mu$ -(*n*-naphthoate) Complexes: An  
Experimental and Theoretical Study

Yusuke Kataoka,<sup>[a],\*</sup> Raiki Fukumoto,<sup>[a]</sup> Natsumi Yano,<sup>[a]</sup> Daiki Atarashi,<sup>[a]</sup>  
Hidekazu Tanaka,<sup>[a]</sup> Tatsuya Kawamoto,<sup>[b]</sup> Makoto Handa<sup>[a],\*</sup>

[a] Department of Chemistry, Interdisciplinary Graduate School of Science and Engineering, Shimane University, 1060 Nishikawatsu, Matsue, Shimane 690-8504, Japan.

[b] Department of Chemistry, Faculty of Science, Kanagawa University, 2946 Tsuchiya, Hiratsuka, Kanagawa 259-1293, Japan.

Corresponding address: kataoka@riko.shimane-u.ac.jp (Y. Kataoka)

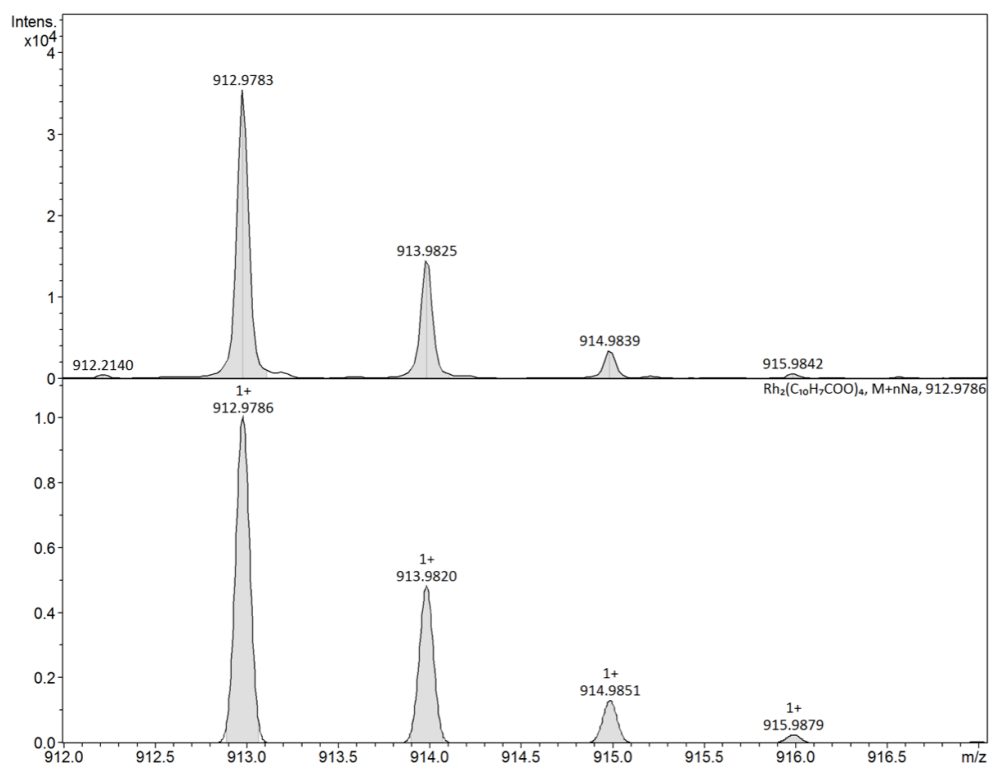

Figure S1. ESI-MS of  $[1(\text{OCMe}_2)_2]$ .

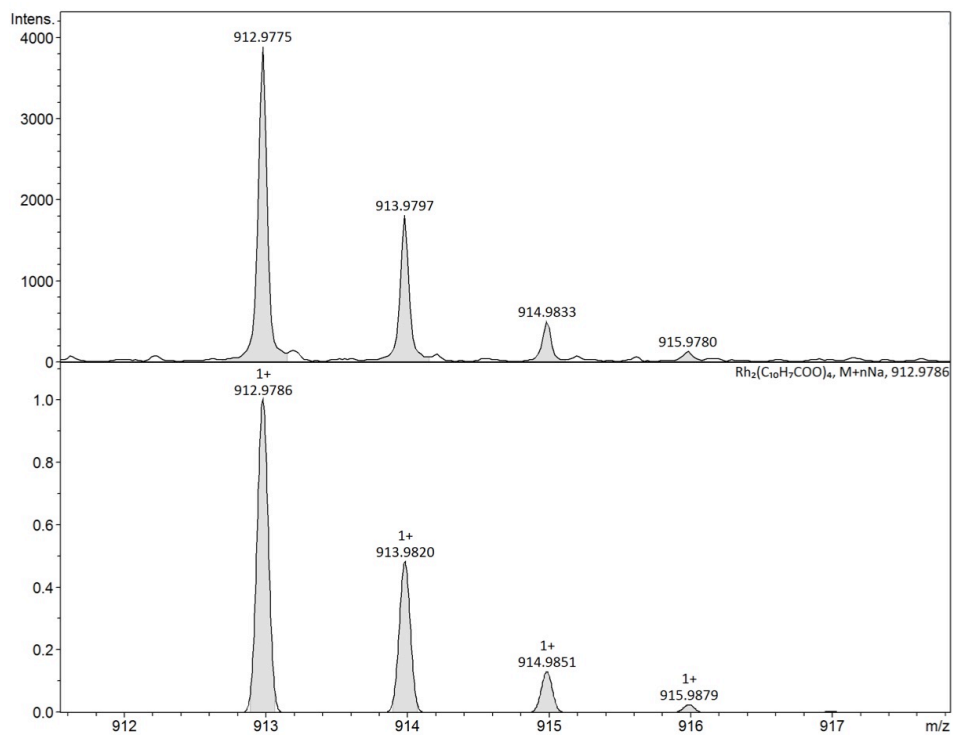

Figure S2. ESI-MS of  $[2(\text{OCMe}_2)_2]$ .

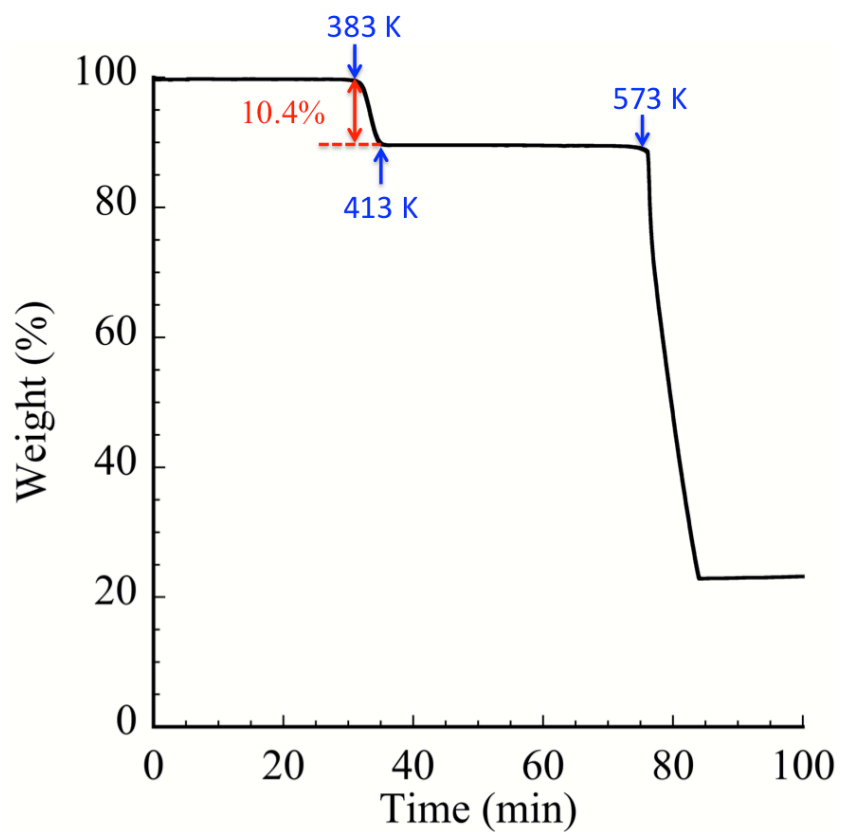

Figure S3. TG curve of [1(OCMe<sub>2</sub>)<sub>2</sub>].

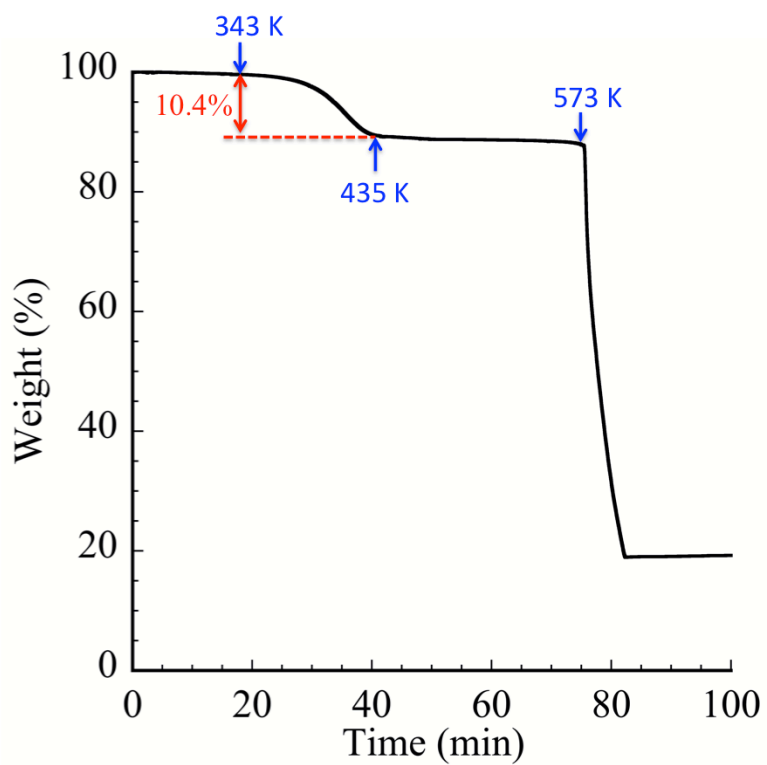

Figure S4. TG curve of [2(OCMe<sub>2</sub>)<sub>2</sub>].

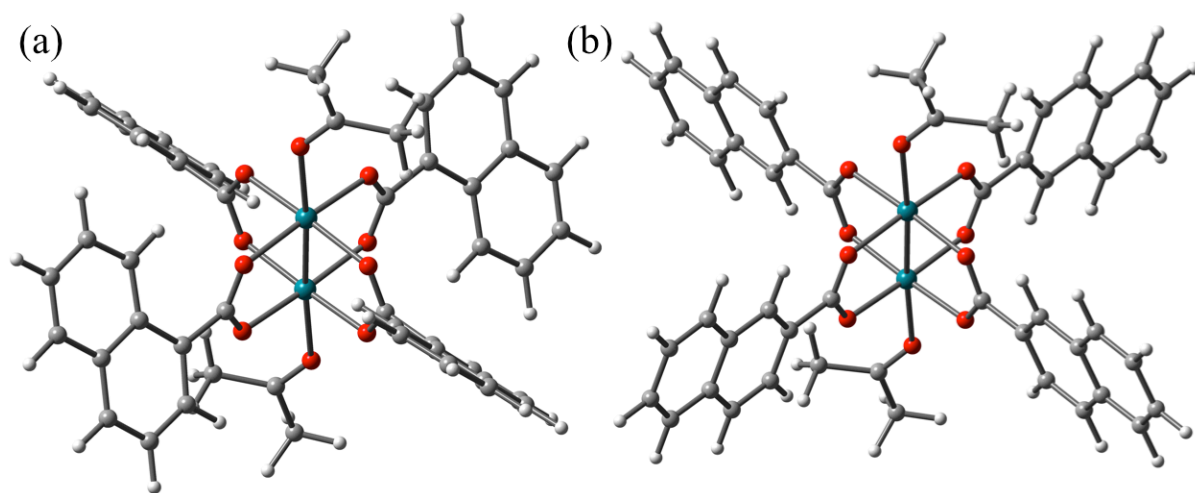

Figure S5. Optimized geometries of (a)  $[1(\text{OCMe}_2)_2]$  and (b)  $[2(\text{OCMe}_2)_2]$ .

Table S1. Calculated excitation wavelengths, oscillator strengths, and excitation characters for **[1(OCMe<sub>2</sub>)<sub>2</sub>]**. (Here, H and L are HOMO and LUMO, respectively).

| State          | Wavelength<br>(nm) | Oscillator strengths<br>( <i>f</i> ) | Major contribution                |
|----------------|--------------------|--------------------------------------|-----------------------------------|
| S <sub>1</sub> | 584.1              | 0.0052                               | H → L (53%), H → L+4 (30%)        |
| S <sub>2</sub> | 580.3              | 0.0046                               | H-1 → L (52%), H-1 → L+4 (29%)    |
| S <sub>5</sub> | 461.1              | 0.0016                               | H-2 → L+6 (56%), H-12 → L+5 (16%) |
| S <sub>6</sub> | 442.4              | 0.0032                               | H → L+5 (51%), H → L+1 (34%)      |
| S <sub>7</sub> | 439.9              | 0.0032                               | H-1 → L+5 (51%), H-1 → L+1 (32%)  |

Table S2. Calculated excitation wavelengths, oscillator strengths, and excitation characters for **[2(OCMe<sub>2</sub>)<sub>2</sub>]**. (Here, H and L are HOMO and LUMO, respectively).

| State          | Wavelength<br>(nm) | Oscillator strengths<br>( <i>f</i> ) | Major contribution |
|----------------|--------------------|--------------------------------------|--------------------|
| S <sub>1</sub> | 580.7              | 0.0059                               | H → L+2 (84%)      |
| S <sub>2</sub> | 576.5              | 0.0055                               | H-1 → L+2 (83%)    |
| S <sub>6</sub> | 433.1              | 0.0041                               | H → L+5 (84%)      |
| S <sub>7</sub> | 430.2              | 0.0041                               | H-1 → L+5 (85%)    |
